# Supplementary material for: Analysis of protein expression in developmental toxicity induced by MeHg in zebrafish
Source: Royal Society of Chemistry journal article supplement (doi:10.1039/c2an35913h), 2012-01-01

## Supplementary Information

- **Protein ID/QT Methods**
- **Table S1.** Proteins found de-regulated in 6 dpf zebrafish larvae exposed to 5 µg/L of MeHg.
- **Table S2.** Proteins found de-regulated in 6dpf zebrafish larvae exposed to 25 µg/L of MeHg.
- **Table S3.** References supporting the organ-specific location of proteins found deregulated upon 25 µg/L MeHg exposure based on in-situ hybridation studies.
- **Figure S1.** Number of identified proteins in the different SCX and IEF fractions in both biological replicates (ZFA and ZFB).
- **Figure S2.** Top network generated by IPA. The associated network functions include cellular assembly and organization; cellular function and maintenance; and cellular movement.
- **Figure S3.** Differences in the size of the swim bladder of control (A) and ZF exposed to 5 (B) and 25 µg/L (C) of MeHg.
- **Figure S4.** Morphological and histological analyses of the eye of control (A, D) and ZF exposed to 5 (B, E) and 25 µg/L (C, F) of MeHg .

## Protein ID/QT Methods

Protein identification and relative quantification were performed with the ProteinPilot™ software (version 3.0; ABSCIEX) using the Paragon™ algorithm as the search engine. Each MS/MS spectrum was searched against the NCBI *Danio rerio* database (released on 08/31/2010) containing 27587 entries, downloaded from [ftp://ftp.ncbi.nih.gov/genomes/D\\_rerio/protein/](ftp://ftp.ncbi.nih.gov/genomes/D_rerio/protein/). The target plus reversed protein database contained 55174 proteins. The search parameters allowed for cysteine modification by methyl methane-thiosulfonate and the 220 biological modifications programmed in the algorithm (i.e., phosphorylations, amidations, semitryptic fragments, etc.). The detected protein threshold (Unused ProtScore (conf)) in the software was set to 1.3 to achieve 95% confidence and identified proteins were grouped by the ProGroup algorithm (Applied Biosystems) to minimize redundancy. The bias correction option was executed so the ratios of each analysis were automatically normalized.

To compare the performance of each separation technique at the protein identification level, the complete set of raw data files of each approach was analysed independently using ProteinPilot, which includes Paragon and ProGroup algorithms). A comparison between the gi Accession numbers of identified proteins from SCX and IEF approaches was carried out using Venn diagrams (*Oliveros, J.C. (2007) VENNY. An interactive tool for comparing lists with Venn Diagrams. <http://bioinfoqp.cnb.csic.es/tools/venny/index.html>*).

The peptide and protein selection criteria for relative quantitation were performed as follows. Proteins were identified on the basis of having at least two peptides with an ion score above 95% confidence. Only peptides unique for a given protein were considered for relative quantitation, excluding those

common to other isoforms or proteins of the same family. Among the identified peptides, some of them were excluded from the quantitative analysis for one of the following reasons: i) the peaks corresponding to the iTRAQ labels were not detected, ii) they were identified with low ID confidence ( $< 1.0\%$ ), iii) because of shared MS/MS spectra, when either the same peptide sequence is claimed by more than one protein or when more than one peptide is fragmented at the same time, iv) the peptide ratios where the sum of the signal-to-noise ratio for all of the peak pairs was  $< 9$ , v) peptides with a combined feature probability less than 30%, including semi-tryptic peptides, peptides missing an iTRAQ reagent label, peptides with low probability modifications and peptides with large delta masses. The protein sequence coverage (95%) was estimated for specific proteins by the percentage of matching amino acids from the identified peptides having confidence greater than or equal to 95% divided by the total number of amino acids in the sequence.

Two quantitative estimates provided for each protein by the ProteinPilot<sup>TM</sup> were utilized: the fold change ratios of differential expression between labelled protein extracts and the  $P$  value, representing the probability that the observed ratio is different to 1 by chance. To estimate and minimize the false discovery rate (FDR), defined as the percentage of decoy proteins identified against the total protein identification, a target-decoy search strategy was followed using a protein sequence database that combines forward and reverse amino acid orientation of every NCBI zebrafish protein sequence. The estimated FDR was less than 0.3% in both biological replicates, indicating high reliability in the proteins identified.

The results were then exported into Excel for manual data interpretation. Although relative quantification and statistical analysis were provided by the ProteinPilot 3.0 software, an additional 1.5-fold change cutoff for all iTRAQ ratios (ratio  $<0.67$  or  $>1.5$ ) was selected to classify proteins as up- or down-regulated. Proteins with iTRAQ ratios below the low range (0.67) were considered to be under-expressed, while those above the high range (1.5) were considered overexpressed. The average ratio provided by ProteinPilot includes correction from experimental bias and is inversely weighted by the % Error on each distinct peptide. For further information about how the average ratio is calculated, please refer to the manual.

**Table S1.** Proteins found de-regulated in 6 dpf zebrafish larvae exposed to 5 µg/L of MeHg.

| Accession number (gi) | Protein name                                        | Common name | Peptides (95%) | iTRAQ ratio 5:Contr | PVMeHg 5:Contr |
|-----------------------|-----------------------------------------------------|-------------|----------------|---------------------|----------------|
| 47550733              | SERPINE1 mRNA binding protein 1                     | serbp1      | 6              | 2.905               | 0.008          |
| 18858587              | elongation factor 1-alpha                           | eef1a       | 25             | 1.764               | 0.011          |
| 18858197              | glutathione S-transferase pi                        | gstp1       | 11             | 2.129               | 0.0001         |
| 18859297              | parvalbumin-2                                       | pvalb2      | 18             | 1.677               | 0.0003         |
| 157787181             | muscle creatine kinase b                            | ckmb        | 42             | 1.659               | 0.0053         |
| 33636707              | parvalbumin 9                                       | pvalb9      | 5              | 1.623               | 0.0062         |
| 55742597              | eukaryotic translation initiation factor 5A-2       | eif5a2      | 3              | 1.589               | 0.0355         |
| 31795559              | troponin T3b, skeletal, fast isoform 2              | tnnt3b      | 13             | 1.538               | 0.0102         |
| 18858947              | keratin 4                                           | krt4        | 58             | 1.537               | 0.0010         |
| 113678458             | vitellogenin 2 isoform 1                            | vtg2        | 650            | 0.647               | 0.000          |
| 156713467             | vitellogenin 7                                      | vtg7        | 795            | 0.641               | 0.001          |
| 68448530              | vitellogenin 5                                      | vtg5        | 878            | 0.639               | 0.000          |
| 189523697             | PREDICTED: titin b                                  | ttnb        | 18             | 0.636               | 0.017          |
| 303227889             | vitellogenin 6                                      | vtg6        | 957            | 0.633               | 0.004          |
| 68444085              | PREDICTED: microfibrillar-associated protein 4-like | mfap4       | 2              | 0.557               | 0.027          |
| 66472252              | slow myosin heavy chain 1                           | smyhc1      | 21             | 0.539               | 0.005          |
| 189523699             | PREDICTED: titin a                                  | ttna        | 10             | 0.415               | 0.001          |
| 238776848             | myosin, heavy polypeptide 1.2, skeletal muscle      | myhz1.2     | 69             | 0.261               | 0.000          |

**Table S2.** Proteins found de-regulated in 6dpf zebrafish larvae exposed to 25 µg/L of MeHg.

| Accession number (gil) | Protein name                                   | Common name     | Peptides (95%) | iTRAQ ratio 25:Contr | PVMeHg 25:Contr |
|------------------------|------------------------------------------------|-----------------|----------------|----------------------|-----------------|
| 189521249              | PREDICTED: hypothetical protein                |                 | 7              | 15.100               | 0.038           |
| 24308537               | zona pellucida glycoprotein 2.4                | zp2.4           | 20             | 7.442                | 0.000           |
| 47086603               | ZPA domain containing protein isoform 2        | si:dkeyp-50f7.2 | 9              | 7.234                | 0.002           |
| 41055329               | acidic chitinase                               | chia            | 5              | 6.041                | 0.006           |
| 94536701               | ZPA domain containing protein isoform 1        | si:dkeyp-50f7.2 | 9              | 6.038                | 0.003           |
| 156739289              | hypothetical protein LOC569326                 | im:691053<br>5  | 4              | 5.993                | 0.001           |
| 125816799              | PREDICTED: si:dkey-46g23.2                     | si:dkey-46g23.2 | 26             | 5.828                | 0.001           |
| 61651682               | fibronectin 1b                                 | fn1b            | 6              | 3.654                | 0.006           |
| 226442998              | hatching enzyme 1b                             | he1b            | 8              | 3.115                | 0.002           |
| 288856329              | myosin, heavy polypeptide 1.1, skeletal muscle | myhz1.1         | 47             | 3.049                | 0.000           |
| 238776848              | myosin, heavy polypeptide 1.2, skeletal muscle | myhz1.2         | 69             | 2.304                | 0.000           |
| 50355968               | calreticulin like                              | calrl           | 10             | 2.154                | 0.047           |
| 41054259               | protein disulfide-isomerase A4                 | pdia4           | 12             | 2.136                | 0.017           |
| 82658290               | high-mobility group box 2                      | hmgb2           | 10             | 2.105                | 0.017           |
| 292610077              | PREDICTED: complement component 3              | c3              | 5              | 2.082                | 0.027           |
| 53749651               | peptidyl-prolyl cis-trans isomerase B          | ppib            | 12             | 2.061                | 0.016           |
| 18858197               | glutathione S-transferase pi                   | gstp1           | 11             | 2.046                | 0.001           |
| 18859107               | nucleoside diphosphate kinase A                | nme2b.1         | 8              | 2.007                | 0.003           |
| 125827065              | PREDICTED: si:dkey-88l16.3                     | si:dkey-88l16.3 | 2              | 1.982                | 0.036           |
| 33636707               | parvalbumin 9                                  | pvalb9          | 5              | 1.948                | 0.041           |
| 292618718              | PREDICTED: vitellogenin 3, phosvitinless       | vtg3            | 61             | 1.862                | 0.000           |
| 41152406               | FK506 binding protein 1A, 12kDa                | fkbp1aa         | 4              | 1.861                | 0.029           |

|           |                                                                  |                |    |       |       |
|-----------|------------------------------------------------------------------|----------------|----|-------|-------|
| 71143098  | tenascin C                                                       | tnc            | 3  | 1.845 | 0.036 |
| 40254675  | lamin-B1                                                         | lmnb1          | 6  | 1.844 | 0.006 |
| 189523699 | PREDICTED: titin a                                               | ttna           | 10 | 1.832 | 0.007 |
| 82524272  | complement component c3b                                         | c3b            | 4  | 1.805 | 0.018 |
| 189535920 | PREDICTED: filamin A, alpha                                      | flna           | 30 | 1.802 | 0.000 |
| 41393111  | ubiquitin carboxyl-terminal<br>hydrolase isozyme L1              | uchl1          | 12 | 1.793 | 0.016 |
| 292619135 | PREDICTED: filamin B, like, partial                              | flnb           | 5  | 1.776 | 0.007 |
| 30410758  | keratin, type I cytoskeletal 18                                  | krt18          | 6  | 1.726 | 0.004 |
| 67972636  | heterogeneous nuclear<br>ribonucleoprotein A/B                   | hnrnab         | 8  | 1.713 | 0.049 |
| 18859297  | parvalbumin-2                                                    | pvalb2         | 18 | 1.619 | 0.006 |
| 56118638  | profilin-2                                                       | pfn2l          | 4  | 1.618 | 0.004 |
| 41151982  | major vault protein                                              | mvp            | 8  | 1.595 | 0.017 |
| 55925229  | ribose-5-phosphate isomerase                                     | rpi            | 5  | 1.575 | 0.010 |
| 65301457  | thioredoxin-dependent peroxide<br>reductase, mitochondrial       | prdx3          | 3  | 1.569 | 0.034 |
| 48597012  | 60S ribosomal protein L23a                                       | rpl23a         | 4  | 1.566 | 0.004 |
| 41152461  | 60S ribosomal protein L7a                                        | rpl7a          | 2  | 1.560 | 0.008 |
| 41386743  | eukaryotic translation elongation<br>factor 2b                   | eef2b          | 33 | 1.558 | 0.038 |
| 292611632 | PREDICTED: hypothetical protein<br>LOC325896                     | BX901973.<br>4 | 5  | 1.557 | 0.045 |
| 68442739  | PREDICTED: histone H4<br>replacement-like                        | his4r          | 13 | 1.549 | 0.024 |
| 41053774  | endoplasmic reticulum resident<br>protein 44                     | erp44          | 3  | 1.542 | 0.043 |
| 41152439  | 60S ribosomal protein L10a                                       | rpl10a         | 5  | 0.666 | 0.006 |
| 71834286  | apolipoprotein B, like                                           | apobl          | 67 | 0.653 | 0.000 |
| 292619319 | PREDICTED: retinol-binding<br>protein 4, plasma-like             | rbp4           | 2  | 0.653 | 0.015 |
| 45387573  | parvalbumin isoform 1d                                           | pvalb1         | 10 | 0.649 | 0.007 |
| 51571925  | adenylate kinase isoenzyme 1                                     | AK1            | 5  | 0.639 | 0.048 |
| 292627608 | PREDICTED: ATPase, H+<br>transporting, lysosomal V1 subunit<br>A | atp6v1a        | 2  | 0.639 | 0.008 |
| 41054770  | WD repeat-containing protein 1                                   | wdr1           | 2  | 0.634 | 0.007 |
| 48762657  | alpha-enolase                                                    | eno1           | 9  | 0.625 | 0.020 |
| 54261787  | interleukin enhancer-binding factor                              | ilf2           | 5  | 0.621 | 0.043 |

|           | 2 homolog                                      |          |    |       |       |
|-----------|------------------------------------------------|----------|----|-------|-------|
| 292617604 | PREDICTED: crystallin, gamma C-like            | crygc    | 7  | 0.609 | 0.018 |
| 18858425  | keratin 5                                      | krt5     | 16 | 0.595 | 0.008 |
| 41054746  | glycine amidinotransferase, mitochondrial      | gatm     | 2  | 0.590 | 0.043 |
| 47550793  | NAD(P) transhydrogenase, mitochondrial         | nnt      | 4  | 0.476 | 0.046 |
| 33504543  | V-type proton ATPase subunit B, kidney isoform | atp6v1ba | 3  | 0.467 | 0.022 |
| 62632719  | hemoglobin beta embryonic-3                    | hbbe3    | 5  | 0.451 | 0.042 |
| 27545277  | elongation factor 1-gamma                      | eef1g    | 8  | 0.407 | 0.035 |



**Table S3.** References supporting organ-specific localization of proteins found de-regulated upon MeHg exposure based on in-situ hybridization studies.

| Accession Number (gi) | Gene name       | Protein Name                                   | iTRAQ ratio | Location                   | Reference                                                                                                                                                                                                                                |
|-----------------------|-----------------|------------------------------------------------|-------------|----------------------------|------------------------------------------------------------------------------------------------------------------------------------------------------------------------------------------------------------------------------------------|
| 189521249             |                 | hypothetical protein                           | 15.10       |                            |                                                                                                                                                                                                                                          |
| 24308537              | zp2.4           | zona pellucida glycoprotein 2.4                | 7.44        |                            |                                                                                                                                                                                                                                          |
| 47086603              | si:dkeyp-50f7.2 | ZPA domain containing protein isoform 2        | 7.23        |                            |                                                                                                                                                                                                                                          |
| 41055329              | chia            | acidic chitinase                               | 6.04        | gut                        | Rauch, G.J., Lyons, D.A., Middendorf, I., Friedlander, B., Arana, N., Reyes, T., and Talbot, W.S. (2003) Submission and Curation of Gene Expression Data. ZFIN Direct Data Submission ( <a href="http://zfin.org">http://zfin.org</a> ). |
| 94536701              | si:dkeyp-50f7.2 | ZPA domain containing protein isoform 1        | 6.04        |                            |                                                                                                                                                                                                                                          |
| 156739289             | im:6910535      | hypothetical protein LOC569326                 | 5.99        |                            |                                                                                                                                                                                                                                          |
| 125816799             | si:dkey-46g23.2 | si:dkey-46g23.2                                | 5.83        |                            |                                                                                                                                                                                                                                          |
| 61651682              | fn1b            | fibronectin 1b                                 | 3.65        | notocord, liver, epidermis | Thisse, B, Pfumio, S., Fürthauer, M., Loppin B., Heyer, V., Degrave, A., Woehl, R., Lux, A., Steffan, T., Charbonnier, X.Q. and Thisse, C. Expression of the zebrafish genome during embryogenesis. ZFIN on-line publication, 2001       |
| 226442998             | he1b            | hatching enzyme 1b                             | 3.12        |                            |                                                                                                                                                                                                                                          |
| 288856329             | myhz1.1         | myosin, heavy polypeptide 1.1, skeletal muscle | 3.05        | fast muscle                | Rauch, G.J., Lyons, D.A., Middendorf, I., Friedlander, B., Arana, N., Reyes, T., and Talbot, W.S. (2003) Submission and Curation of Gene Expression Data. ZFIN Direct Data Submission ( <a href="http://zfin.org">http://zfin.org</a> ). |

|           |                 |                                                |      |                        |                                                                                                                                                                                                                                                                                                                                         |
|-----------|-----------------|------------------------------------------------|------|------------------------|-----------------------------------------------------------------------------------------------------------------------------------------------------------------------------------------------------------------------------------------------------------------------------------------------------------------------------------------|
| 238776848 | myhz1.2         | myosin, heavy polypeptide 1.2, skeletal muscle | 2.30 | fast muscle            | Kotani, T., and Kawakami, K. (2008) misty somites, a maternal effect gene identified by transposon-mediated insertional mutagenesis in zebrafish that is essential for the somite boundary maintenance. <i>Dev. Biol.</i> 316(2): 383-396.                                                                                              |
| 50355968  | calrl           | calreticulin like                              | 2.15 |                        |                                                                                                                                                                                                                                                                                                                                         |
| 41054259  | pdia4           | protein disulfide-isomerase A4                 | 2.14 |                        |                                                                                                                                                                                                                                                                                                                                         |
| 82658290  | hmgb2           | high-mobility group box 2                      | 2.11 | expressed ubiquitously | Thisse, B., Thisse, C. (2004) Fast Release Clones: A High Throughput Expression Analysis. ZFIN Direct Data Submission ( <a href="http://zfin.org">http://zfin.org</a> )                                                                                                                                                                 |
| 292610077 | c3              | complement component 3                         | 2.08 | liver                  | Thisse, B., Thisse, C. (2004) Fast Release Clones: A High Throughput Expression Analysis. ZFIN Direct Data Submission ( <a href="http://zfin.org">http://zfin.org</a> ).                                                                                                                                                                |
| 53749651  | ppib            | peptidyl-prolyl cis-trans isomerase B          | 2.06 |                        |                                                                                                                                                                                                                                                                                                                                         |
| 18858197  | gstp1           | glutathione S-transferase pi                   | 2.05 | liver                  | Cheng, W., Guo, L., Zhang, Z., Soo, H.M., Wen, C., Wu, W., and Peng, J. (2006) HNF factors form a network to regulate liver-enriched genes in zebrafish. <i>Dev. Biol.</i> 294(2): 482-496.                                                                                                                                             |
| 18859107  | nme2b.1         | nucleoside diphosphate kinase A                | 2.01 | whole body, heart      | Hippe, H.J., Wolf, N.M., Abu-Taha, I., Mehringer, R., Just, S., Lutz, S., Niroomand, F., Postel, E.H., Katus, H.A., Rottbauer, W., and Wieland, T. (2009) The interaction of nucleoside diphosphate kinase B with Gbetagamma dimers controls heterotrimeric G protein function. <i>Proc. Natl. Acad. Sci. USA</i> 106(38): 16269-16274. |
| 125827065 | si:dkey-88l16.3 | si:dkey-88l16.3                                | 1.98 |                        |                                                                                                                                                                                                                                                                                                                                         |
| 33636707  | pvalb9          | parvalbumin 9                                  | 1.95 |                        |                                                                                                                                                                                                                                                                                                                                         |

|           |         |                                                  |      |                                                       |                                                                                                                                                                                                                                                              |
|-----------|---------|--------------------------------------------------|------|-------------------------------------------------------|--------------------------------------------------------------------------------------------------------------------------------------------------------------------------------------------------------------------------------------------------------------|
| 292618718 | vtg3    | vitellogenin 3, phosvitinless                    | 1.86 |                                                       |                                                                                                                                                                                                                                                              |
| 41152406  | fkbp1aa | FK506 binding protein 1A, 12kDa                  | 1.86 |                                                       |                                                                                                                                                                                                                                                              |
| 71143098  | tnc     | tenascin C                                       | 1.85 |                                                       |                                                                                                                                                                                                                                                              |
| 40254675  | lmnb1   | lamin-B1                                         | 1.84 |                                                       |                                                                                                                                                                                                                                                              |
| 189523699 | ttna    | titin a                                          | 1.83 | musculature system, myotome, pectoral fin musculature | Thisse, B., Thisse, C. (2004) Fast Release Clones: A High Throughput Expression Analysis. ZFIN Direct Data Submission ( <a href="http://zfin.org">http://zfin.org</a> )                                                                                      |
| 82524272  | c3b     | complement component c3b                         | 1.81 | liver                                                 | Wang, Z., Zhang, S., and Wang, G. (2008) Response of complement expression to challenge with lipopolysaccharide in embryos/larvae of zebrafish <i>Danio rerio</i> : Acquisition of immunocompetent complement. <i>Fish Shellfish Immunol.</i> 25(3): 264-270 |
| 189535920 | flna    | filamin A, alpha                                 | 1.80 |                                                       |                                                                                                                                                                                                                                                              |
| 41393111  | uchl1   | ubiquitin carboxyl-terminal hydrolase isozyme L1 | 1.79 |                                                       |                                                                                                                                                                                                                                                              |
| 292619135 | flnb    | filamin B, like, partial                         | 1.78 |                                                       |                                                                                                                                                                                                                                                              |
| 30410758  | krt18   | keratin, type I cytoskeletal 18                  | 1.73 |                                                       |                                                                                                                                                                                                                                                              |
| 67972636  | hnrnpab | heterogeneous nuclear ribonucleoprotein A/B      | 1.71 | brain, lateral line system                            | Rauch, G.J., Lyons, D.A., Middendorf, I., Friedlander, B., Arana, N., Reyes, T., and Talbot, W.S. (2003) Submission and Curation of Gene Expression Data. ZFIN Direct Data Submission ( <a href="http://zfin.org">http://zfin.org</a> )                      |
| 18859297  | pvalb2  | parvalbumin-2                                    | 1.62 |                                                       |                                                                                                                                                                                                                                                              |
| 56118638  | pfn2l   | profilin-2                                       | 1.62 |                                                       |                                                                                                                                                                                                                                                              |

|           |            |                                                         |       |                                   |                                                                                                                                                                                                                                          |
|-----------|------------|---------------------------------------------------------|-------|-----------------------------------|------------------------------------------------------------------------------------------------------------------------------------------------------------------------------------------------------------------------------------------|
| 41151982  | mvp        | major vault protein                                     | 1.60  | blastema m<br>esenchymal<br>cell  | Yoshinari, N., Ishida, T., Kudo, A., and Kawakami, A. (2009) Gene expression and functional analysis of zebrafish larval fin fold regeneration. Dev. Biol. 325(1): 71-81                                                                 |
| 55925229  | rpia       | ribose-5-phosphate isomerase                            | 1.58  |                                   |                                                                                                                                                                                                                                          |
| 65301457  | prdx3      | thioredoxin-dependent peroxide reductase, mitochondrial | 1.57  |                                   |                                                                                                                                                                                                                                          |
| 48597012  | rpl23a     | 60S ribosomal protein L23a                              | 1.57  |                                   |                                                                                                                                                                                                                                          |
| 41152461  | rpl7a      | 60S ribosomal protein L7a                               | 1.56  |                                   |                                                                                                                                                                                                                                          |
| 41386743  | eef2b      | eukaryotic translation elongation factor 2b             | 1.56  | epidermis                         | Rauch, G.J., Lyons, D.A., Middendorf, I., Friedlander, B., Arana, N., Reyes, T., and Talbot, W.S. (2003) Submission and Curation of Gene Expression Data. ZFIN Direct Data Submission ( <a href="http://zfin.org">http://zfin.org</a> ). |
| 292611632 | BX901973.4 | hypothetical protein LOC325896                          | 1.56  |                                   |                                                                                                                                                                                                                                          |
| 68442739  | his4r      | histone H4 replacement-like                             | 1.55  |                                   |                                                                                                                                                                                                                                          |
| 41053774  | erp44      | endoplasmic reticulum resident protein 44               | 1.54  |                                   |                                                                                                                                                                                                                                          |
| 41152439  | rpl10a     | 60S ribosomal protein L10a                              | -1.49 |                                   |                                                                                                                                                                                                                                          |
| 71834286  | apobl      | apolipoprotein B, like                                  | -1.54 |                                   |                                                                                                                                                                                                                                          |
| 292619319 | rbp4       | retinol-binding protein 4, plasma-like                  | -1.54 | liver                             | Cheng, W., Guo, L., Zhang, Z., Soo, H.M., Wen, C., Wu, W., and Peng, J. (2006) HNF factors form a network to regulate liver-enriched genes in zebrafish. Dev. Biol. 294(2): 482-496                                                      |
| 45387573  | pvalb1     | parvalbumin isoform 1d                                  | -1.54 | musculature<br>system,<br>myotome | Thisse, C., and Thisse, B. (2005) High Throughput Expression Analysis of ZF-Models Consortium Clones. ZFIN Direct Data Submission ( <a href="http://zfin.org">http://zfin.org</a> ).                                                     |
| 51571925  | AK1        | adenylate kinase isoenzyme 1                            | -1.56 |                                   |                                                                                                                                                                                                                                          |

|           |          |                                           |       |                            |                                                                                                                                                                                                                            |
|-----------|----------|-------------------------------------------|-------|----------------------------|----------------------------------------------------------------------------------------------------------------------------------------------------------------------------------------------------------------------------|
| 292627608 | atp6v1a  | ATPase, H+ transporting, lysosomal V1     | -1.56 | central nervous system     | Thisse, B., Thisse, C. (2004) Fast Release Clones: A High Throughput Expression Analysis. ZFIN Direct Data Submission ( <a href="http://zfin.org">http://zfin.org</a> ).                                                   |
| 41054770  | wdr1     | WD repeat-containing protein 1            | -1.59 |                            |                                                                                                                                                                                                                            |
| 48762657  | eno1     | alpha-enolase                             | -1.59 |                            |                                                                                                                                                                                                                            |
| 54261787  | ilf2     | interleukin enhancer-binding factor 2     | -1.61 | blastema mesenchymal cell  | Yoshinari, N., Ishida, T., Kudo, A., and Kawakami, A. (2009) Gene expression and functional analysis of zebrafish larval fin fold regeneration. <i>Dev. Biol.</i> 325(1): 71-81.                                           |
| 292617604 | crygc    | crystallin, gamma C-like                  | -1.64 |                            |                                                                                                                                                                                                                            |
| 18858425  | krt5     | keratin 5                                 | -1.67 | epidermal cell             | Reischauer, S., Levesque, M.P., Nüsslein-Volhard, C., and Sonawane, M. (2009) Lgl2 executes its function as a tumor suppressor by regulating ErbB signaling in the zebrafish epidermis. <i>PLoS Genet.</i> 5(11): e1000720 |
| 41054746  | gatm     | glycine amidinotransferase, mitochondrial | -1.69 | Intestine, liver, pancreas | Cheng, W., Guo, L., Zhang, Z., Soo, H.M., Wen, C., Wu, W., and Peng, J. (2006) HNF factors form a network to regulate liver-enriched genes in zebrafish. <i>Dev. Biol.</i> 294(2): 482-496.                                |
| 47550793  | nnt      | NAD(P) transhydrogenase, mitochondrial    | -2.08 |                            |                                                                                                                                                                                                                            |
| 33504543  | atp6v1ba | V-type proton ATPase subunit B            | -2.13 |                            |                                                                                                                                                                                                                            |
| 62632719  | hbbe3    | hemoglobin beta embryonic-3               | -2.22 |                            |                                                                                                                                                                                                                            |
| 27545277  | eef1g    | elongation factor 1-gamma                 | -2.44 | whole organism             | Thisse, B., Thisse, C. (2004) Fast Release Clones: A High Throughput Expression Analysis. ZFIN Direct Data Submission ( <a href="http://zfin.org">http://zfin.org</a> ).                                                   |

Fig. S1

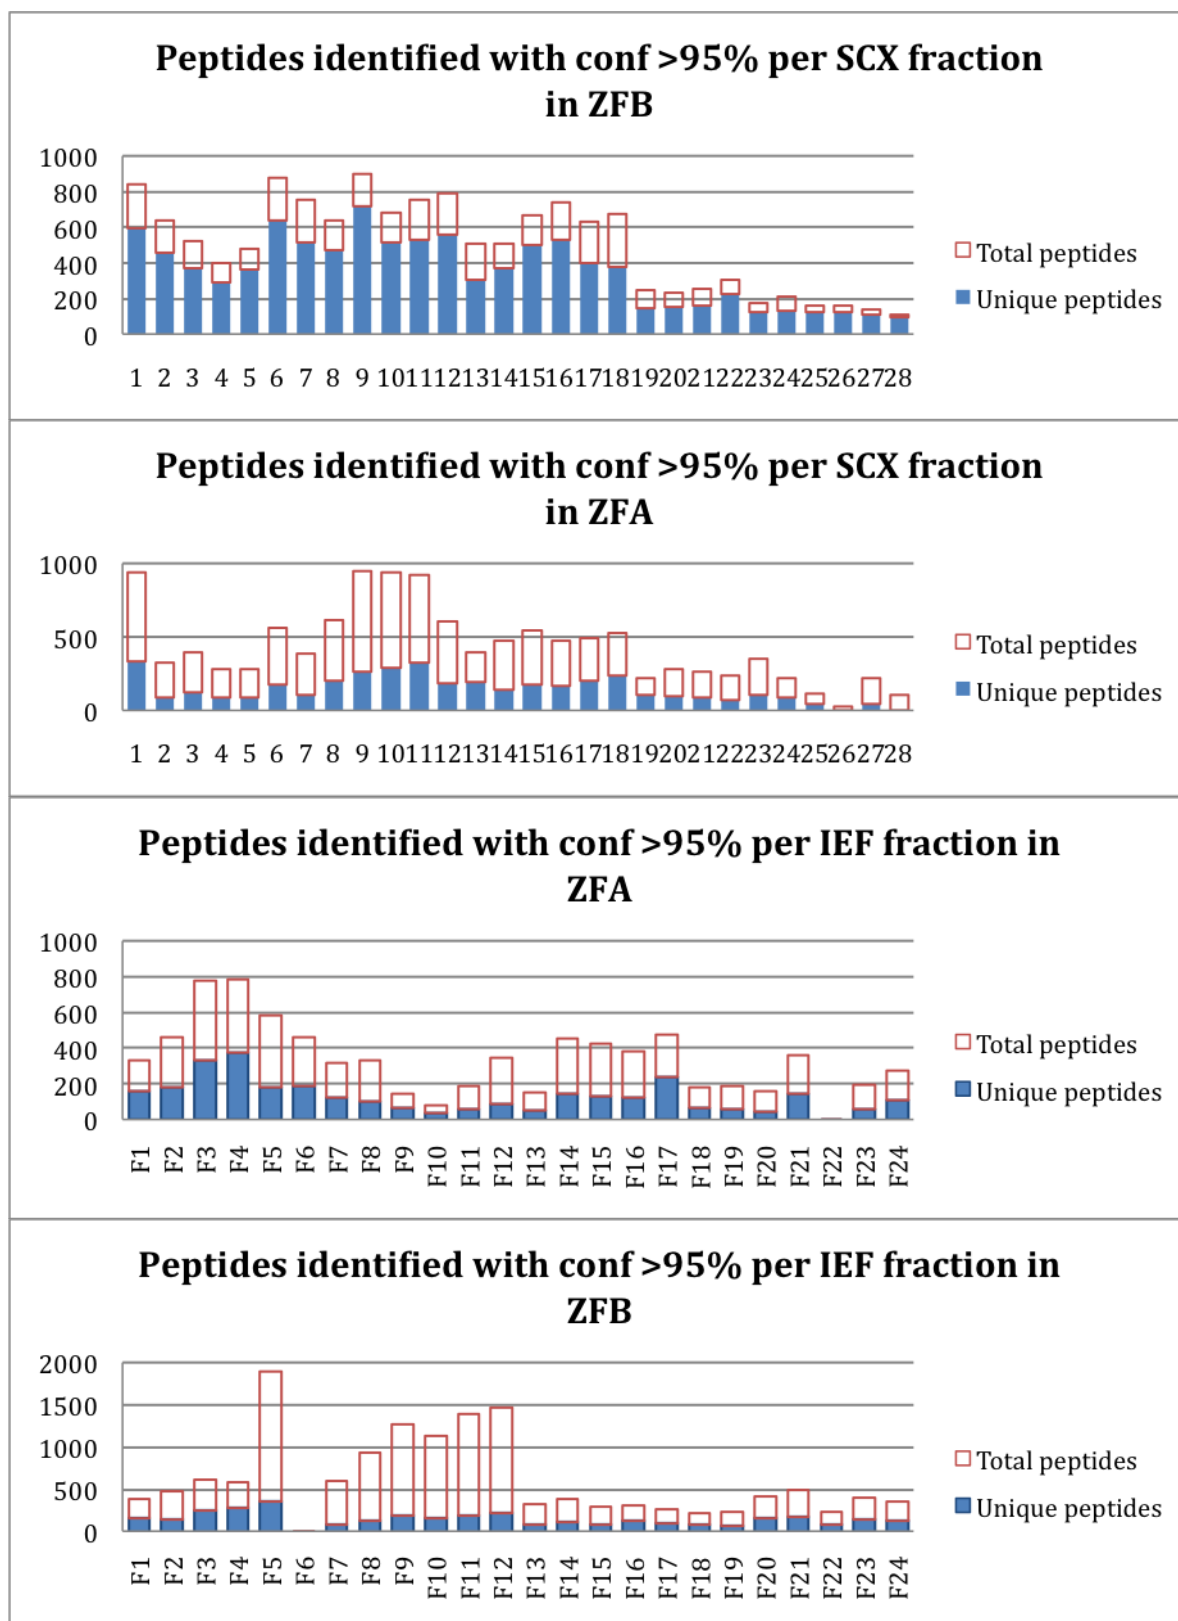

Fig. S2

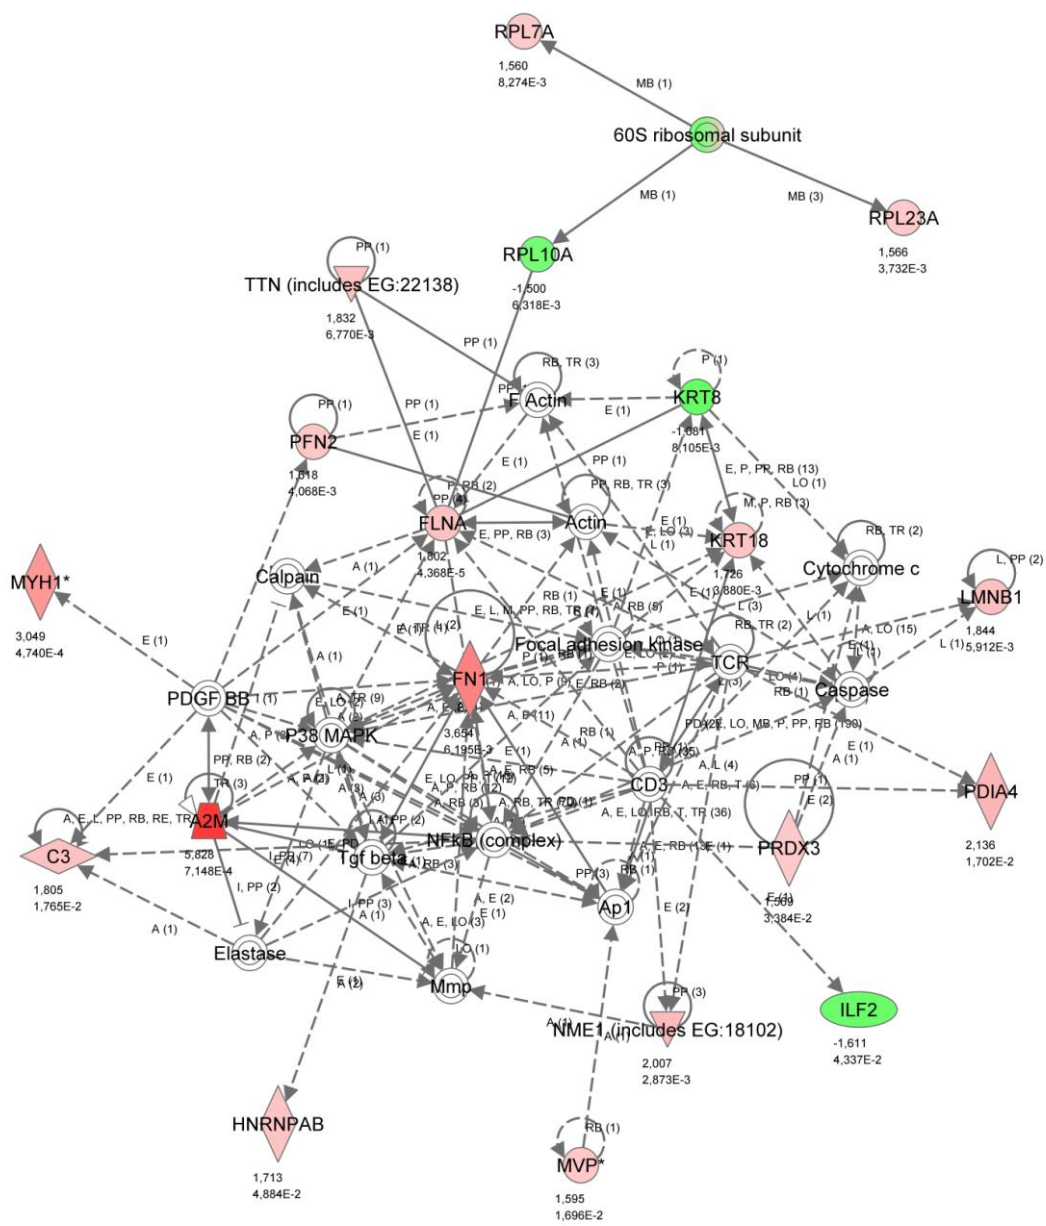

© 2000-2012 Ingenuity Systems, Inc. All rights reserved.

Fig. S3

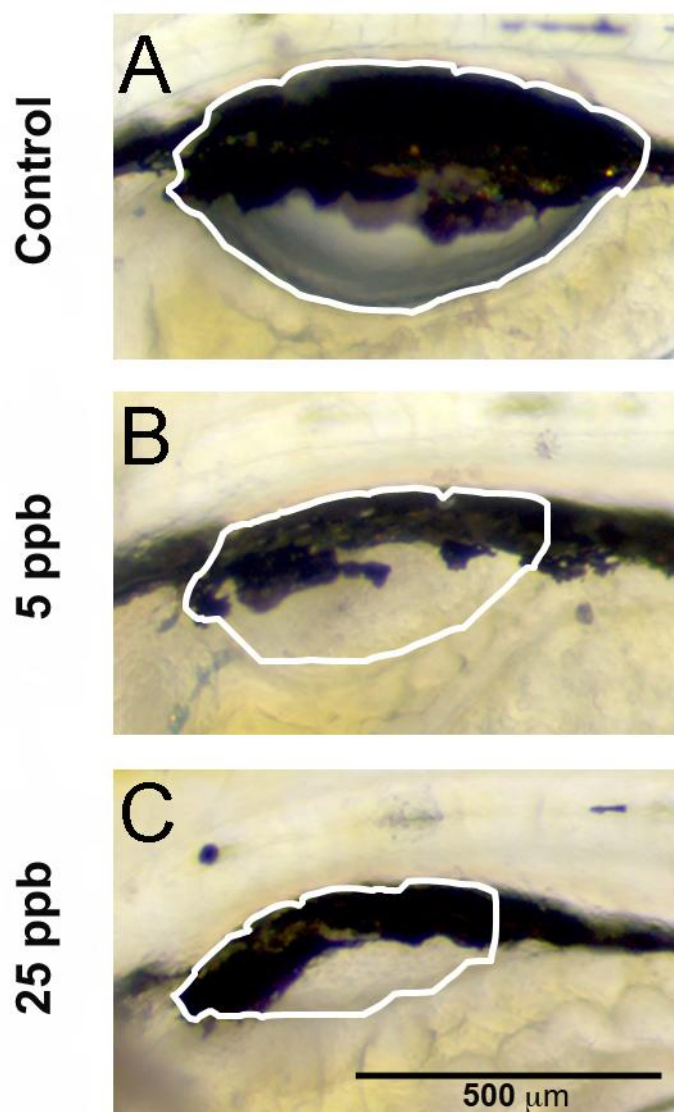



Fig. S4

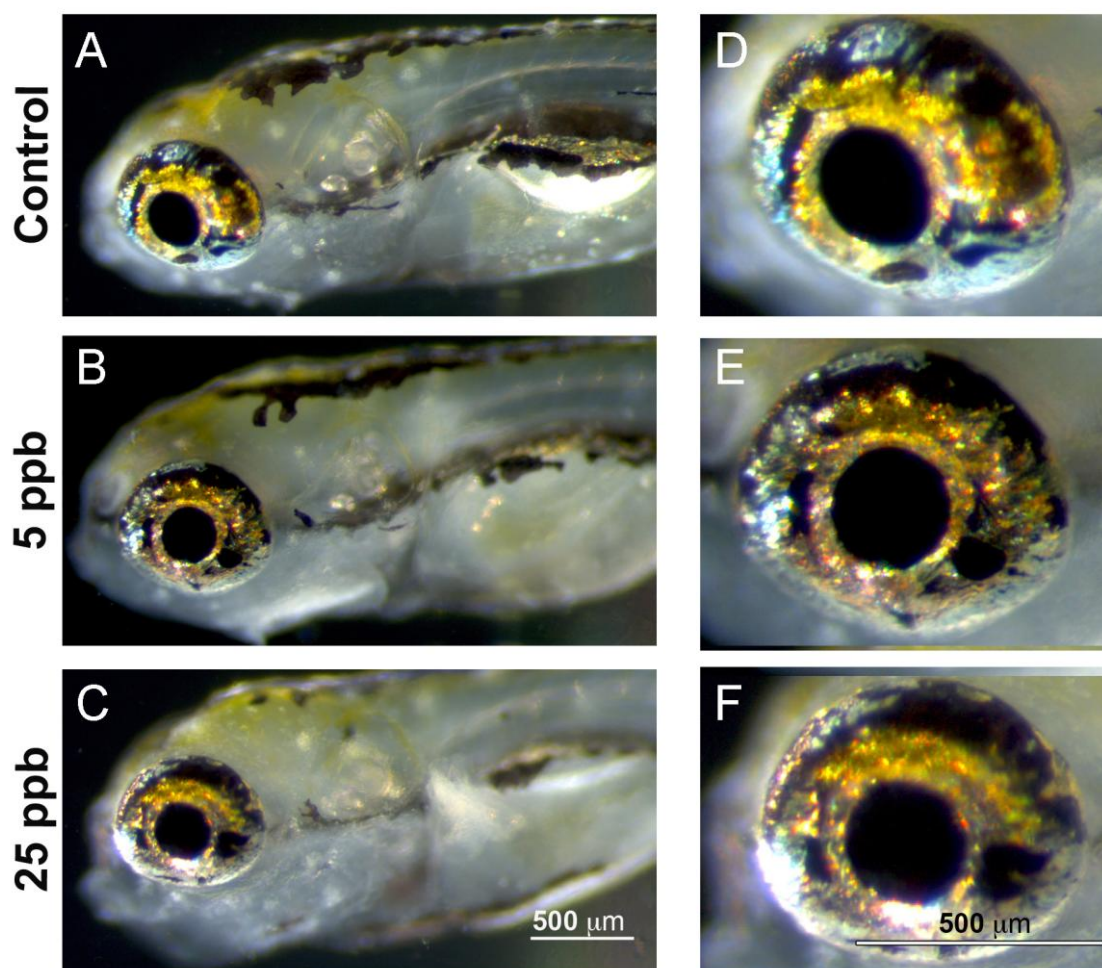

Supplement: c2an35913h.pdf [file c2an35913h.pdf]
